# Supplementary material
Source: PubMed Central journal article supplement (PMC3318784)
Supplement: supp_78.8.2936_AEM6833-11_supplemental.pdf [file supp_78.8.2936_AEM6833-11_supplemental.pdf]

Supplementary Figures :

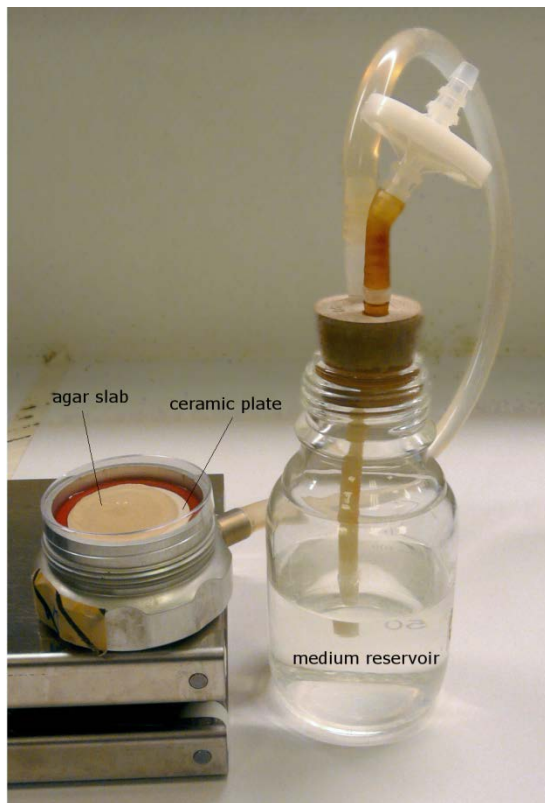

**Supplementary Figure 1.** Photograph of the agar-slab PSM system. Matric potential is manipulated by changing the relative elevation of the slab in its container with respect to the air / liquid interface in the medium reservoir.

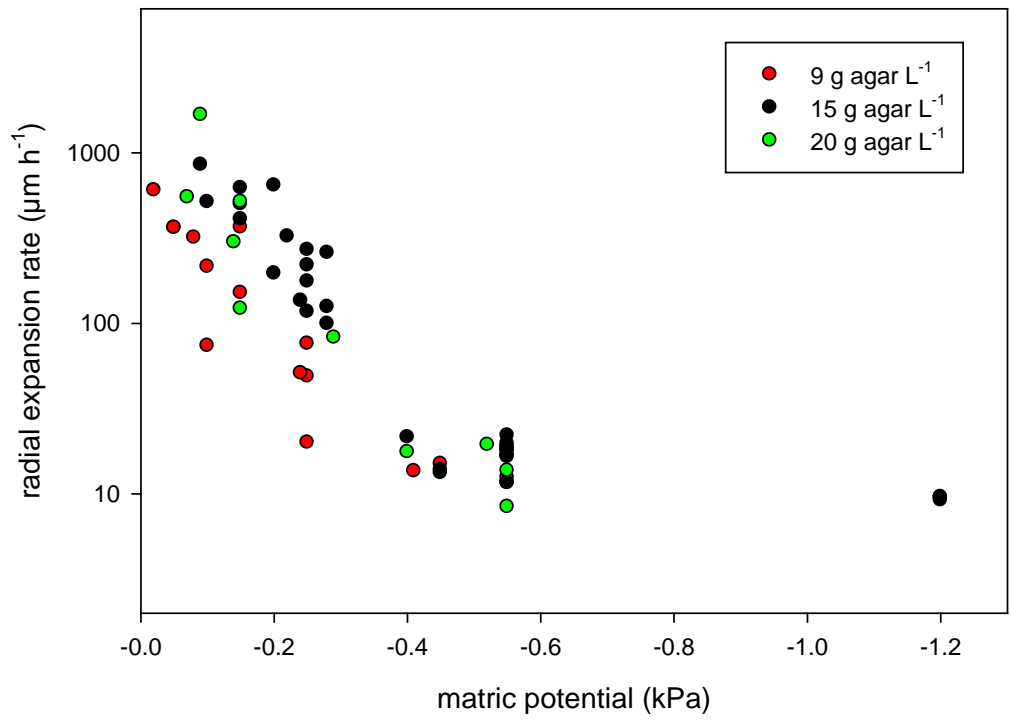

**Supplementary Figure 2.** Comparison of DSS73 expansion rate on slabs with different initial agar concentrations.

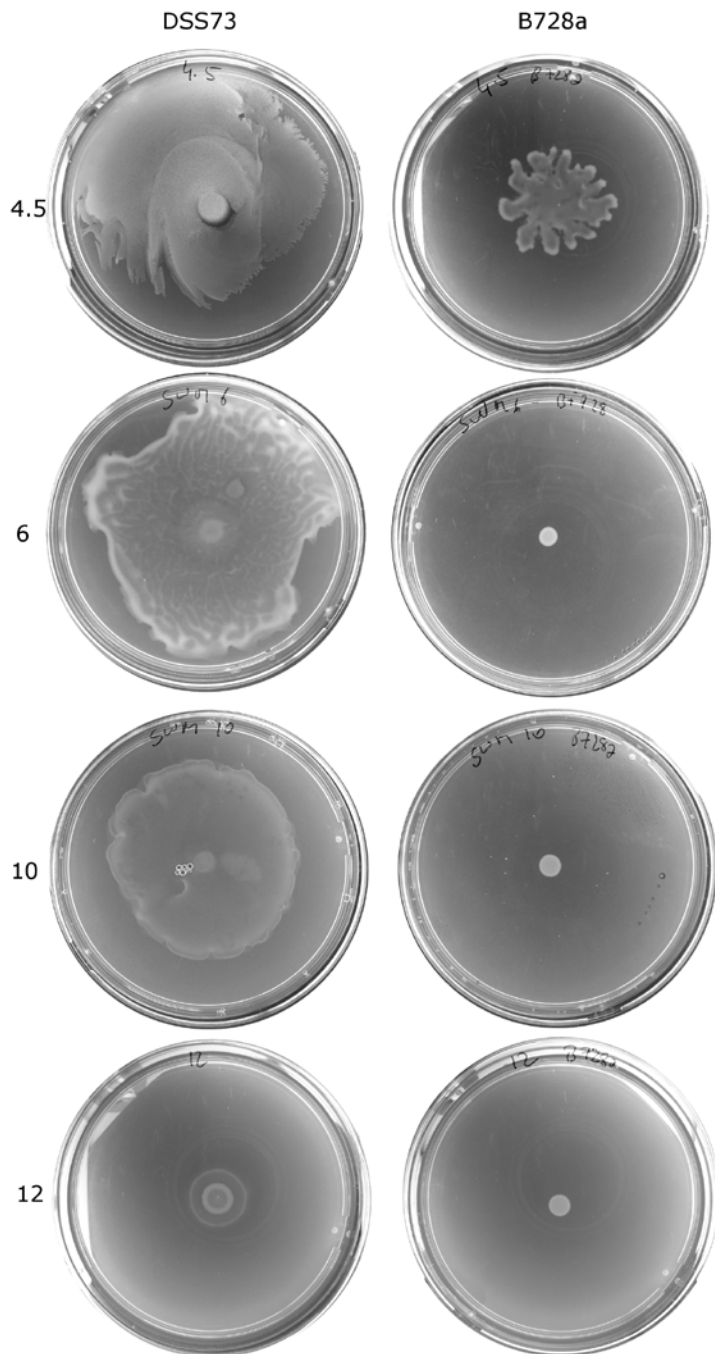

**Supplementary Figure 3.**

Spreading of DSS73 (left column) and B728a (right column) after 17h of incubation on swarming plates (9 cm Petri dishes) containing SWM medium solidified with 4.5 to 12 g agar per L. Note that B728a developed swarming on the plates solidified with 6 and 8 g per L upon extended incubation. The contrast of the images has been improved digitally.
